# Supplementary material for: Single-molecule functional anatomy of endogenous HER2-HER3 heterodimers
Source: eLife. 2020 Apr 8;9:e53934. doi: 10.7554/eLife.53934 (PMC7176432; doi:10.7554/eLife.53934)
Supplement: Figure 1—source data 1. [file elife-53934-fig1-data1.xlsx]

## Sheet: Sheet1
Fig.1d
	H3H2G+	H3H2G+			H2H3G+	H2H3G+			eGFP	eGFP	eGFP
S1	263	200			502	517			40	31	31
S2	10	9			48	49			4	2	2
S3	2	1			19	12			1	3	3
	275	210	242.5		569	578	573.5		45	36	36	39
			mean	std			mean	std				mean	std
	95.6364	95.2381	95.4372	0.281618	88.225	89.4464	88.8357	0.863668	88.8889	86.1111	86.1111	87.037	1.60375
	3.63636	4.28571	3.96104	0.45916	8.43585	8.47751	8.45668	0.0294554	8.88889	5.55556	5.55556	6.66667	1.9245
	0.727273	0.47619	0.601732	0.177542	3.33919	2.07612	2.70766	0.893123	2.22222	8.33333	8.33333	6.2963	3.52825
Cumulative
S1	95.6364	95.2381			88.225	89.4464			88.8889	86.1111	86.1111
S2	99.2727	99.5238			96.6608	97.9239			97.7778	91.6667	91.6667
