# Supplementary material for: Single-molecule functional anatomy of endogenous HER2-HER3 heterodimers
Source: eLife. 2020 Apr 8;9:e53934. doi: 10.7554/eLife.53934 (PMC7176432; doi:10.7554/eLife.53934)
Supplement: Figure 3—source data 1. [file elife-53934-fig3-data1.xlsx]

## Sheet: Sheet1
Fig.3c		At 15 uM ATP, and 2 mM Mg2+
	HER3 pY1197			HER3 pY1222			HER3 pY1276			HER3 pY1328
time(sec)	Mean	STD	time(sec)	Mean	STD	time(sec)	Mean	STD	time(sec)	Mean	STD
0	266.9	17.381	0	160.5	13.2434	0	75.2	10.3795	0	175.8	16.7053
5	628.4	22.9986	5	396.2	23.38	5	272.2	17.1775	5	368.5	14.9982
10	714.9	37.3882	10	504.5	20.0402	10	366.4	22.5645	10	484.6	20.5112
20	837.9	17.4321	20	564.5	18.0139	20	457.3	21.5667	20	609.3	24.3495
40	867.4	21.2247	40	573.3	19.2472	40	466.7	23.688	40	618.3	24.1157
Fig.3d		At 200 uM ATP, and 2 mM Mg2+
	HER2 pY1139			HER2 pY1196			HER2 pY1221/22			HER2 pY1248
time(min)	Mean	STD	time(min)	Mean	STD	time(min)	Mean	STD	time(min)	Mean	STD
0	82.4	8.22192	0	208.5	17.621	0	97.7	9.93367	0	107.3	3.19896
10	234.909	13.8885	10	451.5	25.9968	10	223.3	15.6066	10	501.5	30.9955
20	277.1	8.81224	20	594.6	35.053	20	246.3	12.7719	20	687.5	21.7422
30	319.182	26.5624	30	629	49.8999	30	264.8	11.8958	30	835.8	27.194
40	350.818	26.5361	40	644	47.5511	40	280.5	21.2459	40	892.4	21.8642
