# Supplementary material for: Single-molecule functional anatomy of endogenous HER2-HER3 heterodimers
Source: eLife journal article supplement (doi:10.7554/elife.53934), 2020-04-08
Supplement: supp [file elife_poa_e53934_Figure_2_source_data_1.xlsx]

## Sheet: Sheet1
Fig.2b
pY1197			pY1222			pY1276			pY1289			pY1328
-HER3 Ab	ATPMg	ATPEDTA	-HER3 Ab	ATPMg	ATPEDTA	-HER3 Ab	ATPMg	ATPEDTA	-HER3 Ab	ATPMg	ATPEDTA	-HER3 Ab	ATPMg	ATPEDTA
152	538	362	108	452	259	145	447	175	64	284	105	129	448	128
146	565	387	115	478	240	168	431	157	64	331	107	145	481	134
146	519	390	115	445	219	143	430	174	73	300	103	143	455	134
155	553	384	114	462	240	166	416	158	79	306	103	135	440	137
153	512	393	114	473	270	157	469	195	72	304	77	119	465	113
143	521	408	121	462	252	148	435	154	78	298	108	123	465	133
147	531	392	91	449	243	149	440	174	64	310	95	132	456	117
133	570	375	122	453	261	140	419	166	66	299	106	125	472	128
121	514	413	112	454	241	157	447	147	65	315	90	135	458	117
135	542	422	130	456	218	144	426	167	80	290	111	135	474	139
Fig.2d
HER2 pY1139				HER2 pY1196				HER2 pY1221/22				HER2 pY1248
-		+NRG1-b1		-		+NRG1-b1		-		+NRG1-b1		-		+NRG1-b1
ATP/EDTA	ATP/Mg2+	ATP/EDTA	ATP/Mg2+	ATP/EDTA	ATP/Mg2+	ATP/EDTA	ATP/Mg2+	ATP/EDTA	ATP/Mg2+	ATP/EDTA	ATP/Mg2+	ATP/EDTA	ATP/Mg2+	ATP/EDTA	ATP/Mg2+
56	109	71	425	37	93	44	491	60	92	186	344	39	51	178	366
59	96	55	407	41	116	43	546	68	81	173	370	40	57	213	380
51	102	63	436	52	102	38	552	68	101	129	344	34	48	174	349
75	130	60	372	32	121	17	543	57	75	144	319	37	56	181	330
76	115	54	388	32	90	21	551	74	89	169	324	54	43	199	351
65	87	82	395	51	92	34	541	89	84	181	337	46	55	228	341
77	94	62	437	29	114	34	470	63	90	199	333	39	63	195	337
61	102	79	421	40	119	32	489	66	88	184	360	40	57	176	357
66	98	90	406	42	117	42	461	95	94	154	309	29	62	214	342
69	85	81	375	50	103	13	491	71	91	187	309	46	68	168	362
Fig.2e
ATPMg						ATPEDTA
dig 0.1	gdn 0.01	chapso 1.0	og 1.0	ddm 0.01	tx 0.1	dig 0.1
176	174	96	77	84	91	91
163	228	92	86	91	108	68
191	209	85	98	94	96	103
178	202	108	86	86	75	74
189	190	101	91	91	92	89
172	202	93	82	95	101	76
192	193	96	101	103	88	85
181	220	91	67	114	95	71
173	200	109	76	69	94	87
178	195	97	99	105	101	69
Fig.2h
ATP Mg				ATP EDTA
H2WT&H3WT	H2IQ&H3WT	H2WT&H3VR	H2VR&H3WT	H2WT&H3WT	H2IQ&H3WT	H2WT&H3VR	H2VR&H3WT		ATP MG - ATP EDTA
+	+	+	+	+	+	+	+		H2WT&H3WT	H2IQ&H3WT	H2WT&H3VR	H2VR&H3WT			Normalized amount of HER2&HER3 heterodimer
1139	505	362	1067	355	412	291	422		#REF!	#REF!	#REF!	#REF!			1
1095	524	346	1111	348	394	301	398		#REF!	#REF!	#REF!	#REF!			1.14496
1033	537	391	1128	346	365	314	434		#REF!	#REF!	#REF!	#REF!			0.539545
1024	468	358	1076	369	413	279	422		#REF!	#REF!	#REF!	#REF!			0.827872
1058	470	350	1062	380	360	315	445		#REF!	#REF!	#REF!	#REF!						calibrated
1141	525	393	1206	310	365	355	444		#REF!	#REF!	#REF!	#REF!			744.7	44.9919		744.7	44.9919
1117	572	389	1148	307	425	302	434		#REF!	#REF!	#REF!	#REF!			124.3	37.2381		108.563	34.8011
1053	549	342	1183	325	460	308	406		#REF!	#REF!	#REF!	#REF!			55.7	22.0857		103.235	30.0675
1056	550	344	1195	317	430	315	408		#REF!	#REF!	#REF!	#REF!			707.2	52.8772		854.239	58.1148
1130	573	335	1144	342	406	273	435		#REF!	#REF!	#REF!	#REF!
1084.6	527.3	361	1132	339.9	403	305.3	424.8		#REF!	#REF!	#REF!	#REF!
									#REF!	#REF!	#REF!	#REF!
